# Supplementary material for: People with Parkinson’s Disease: What Symptoms Do They Most Want to Improve and How Does This Change with Disease Duration?
Source: PubMed Central journal article supplement — J Parkinsons Dis. 2021 Apr 13;11(2):715–24. doi: 10.3233/JPD-202346 (PMC8150663; doi:10.3233/jpd-202346), 2021-04-13
Supplement: jpd-11-jpd202346-s001.pdf [file jpd-11-jpd202346-s001.pdf]

## Supplementary Material

### People with Parkinson's Disease: What Symptoms Do They Most Want to Improve and How Does This Change with Disease Duration?

**Supplementary Table 1. Scheme for interpreting survey responses.** Table shows in the right hand column the free text terms used by respondents to describe symptoms or issues and how these were interpreted and recorded in the left hand column.

| <b>Symptom</b>       | <b>Terms used by survey respondents</b>                                                                                                                                                                                                                                                     |
|----------------------|---------------------------------------------------------------------------------------------------------------------------------------------------------------------------------------------------------------------------------------------------------------------------------------------|
| <b>Movement</b>      | movement, mobility, fluid movements, move freely, move normally, getting out of chair, motor function, moving in confined spaces, flexibility, upper limb movements, control of my legs, hanging arm, right leg, restricted movement, lack of foot dorsiflexion, overgripping, body control |
| <b>Moving in bed</b> | turning/moving in bed                                                                                                                                                                                                                                                                       |
| <b>Walking</b>       | walking, scuffing feet, shuffle, gait, dragging foot, step, stumble, arm swing, limping, trip, natural arm swing while walking/running                                                                                                                                                      |
| <b>Slowness</b>      | slowness of movement, bradykinesia, speed, faster, faster pace, quicker                                                                                                                                                                                                                     |
| <b>Stiffness</b>     | stiffness, rigidity, seizing up                                                                                                                                                                                                                                                             |
| <b>Posture</b>       | posture, leaning, neck position, pisa syndrome, head drop                                                                                                                                                                                                                                   |
| <b>Fitness</b>       | stamina, body fitness, ability to exercise, ability to walk a (reasonable) distance / further, swimming, tennis, hike, athletic ability, riding a bike, *specific mention of ability to do other exercise-based activities*, dog-walking                                                    |
| <b>Weakness</b>      | weakness, loss of power, loss of strength, muscular problems                                                                                                                                                                                                                                |
| <b>Freezing</b>      | freezing, freezing of gait, festination, hesitation, feet sticking, able to move feet                                                                                                                                                                                                       |
| <b>Balance</b>       | balance, stability, unsteady, wobbly, ability to descend stairs in safety, coping with uneven surfaces                                                                                                                                                                                      |
| <b>Falls</b>         | falls, falling, fear of falling                                                                                                                                                                                                                                                             |
| <b>Dexterity</b>     | dexterity, fine movement, hand movement, typing, handwriting, motor function in hand, (loss of) hand control, handle clothing / cutlery, clumsiness, motor skills                                                                                                                           |

|                              |                                                                                                                                                                                                                                          |
|------------------------------|------------------------------------------------------------------------------------------------------------------------------------------------------------------------------------------------------------------------------------------|
| <b>Facial expression</b>     | facial expression, smiling, masking, lop-sided expression, facial spasm, facial stiffness, facial movement                                                                                                                               |
| <b>Coordination</b>          | coordination, controlled movement                                                                                                                                                                                                        |
| <b>Tremor</b>                | tremor, shaking, trembling, internal shaking, nodding head/chin, quivering lips                                                                                                                                                          |
| <b>Fatigue</b>               | Fatigue, fatigue of muscles, muscle fatigue, dullness and heaviness of limbs                                                                                                                                                             |
| <b>Tiredness</b>             | tiredness, tired, drowsiness, weariness, tiredness after exercise, tired legs, tired and weary legs                                                                                                                                      |
| <b>Lack of energy</b>        | lack of energy, exhaustion, lethargy                                                                                                                                                                                                     |
| <b>Sleep</b>                 | sleep disorders, insomnia, deprivation, quality, vivid dreams, disturbed nights, thrashing around in bed, sleeplessness, disturbed sleep, night disturbance, stop dreams, lack of sleep at night                                         |
| <b>Daytime sleepiness</b>    | falling asleep unexpectedly / when you don't want to, sleepiness as a side effect of medication, fall asleep within minutes of sitting down, ability to stay awake during the day, doziness, sleepiness                                  |
| <b>Cognitive impairment</b>  | cognitive ability, (loss of) concentration, clarity of thought, mental fog, slowness of thought, confusion, alertness, speed of thought, executive function, recall, coordination (mentally), not being able to think of the right words |
| <b>Memory</b>                | memory, forgetfulness, remembering things                                                                                                                                                                                                |
| <b>Dementia</b>              | dementia                                                                                                                                                                                                                                 |
| <b>Speech</b>                | speech, articulation, voice, communication, voice, when talking to others, confusion of speech, difficulty holding a conversation                                                                                                        |
| <b>Eating and Swallowing</b> | swallowing, choking, (difficulty) eating, food, feeding                                                                                                                                                                                  |
| <b>Saliva problems</b>       | drooling, dribbling, dry mouth, discoloured (yellow) saliva                                                                                                                                                                              |
| <b>Incontinence</b>          | incontinence, continence                                                                                                                                                                                                                 |
| <b>Bladder</b>               | nocturia, bladder control, urinary problems, hold to get to the toilet, urinary symptoms, urinary urgency, overactive bladder, urinary tract infection, poor and messy passing                                                           |
| <b>Bowel</b>                 | constipation, bowel normality, bowel movements, digestive problems, crashing because of constipation meds not working                                                                                                                    |

|                                     |                                                                                                                                                                                                                                                                                                                              |
|-------------------------------------|------------------------------------------------------------------------------------------------------------------------------------------------------------------------------------------------------------------------------------------------------------------------------------------------------------------------------|
| <b>Pain</b>                         | pain, ache, pain relief, discomfort, muscular pain, ear-ache                                                                                                                                                                                                                                                                 |
| <b>Dystonia</b>                     | dystonia, cramps, spasm, twisting, foot turning over, night cramps                                                                                                                                                                                                                                                           |
| <b>Unpleasant sensation</b>         | numbness, pins and needles, burning sensation, creepy crawlies, restlessness                                                                                                                                                                                                                                                 |
| <b>Restless legs</b>                | Restless leg, able to sit still                                                                                                                                                                                                                                                                                              |
| <b>Depression</b>                   | depression, emotionally down,                                                                                                                                                                                                                                                                                                |
| <b>Mood</b>                         | (change in) mood, low mood, positive outlook, grumpiness, mood swings, anger, frustrated, feel normal, feeling that life's passing me by,                                                                                                                                                                                    |
| <b>Apathy</b>                       | apathy, lack of motivation, disinterest, failure to carry out tasks, loss of enthusiasm                                                                                                                                                                                                                                      |
| <b>Psychological impact</b>         | psychological impact, personality changes, accepting diagnosis, embarrassment, people to stop thinking you are incapable because you have Parkinson's, self-conscious, worrying / fear about the future, being less focused on small details, worry about my ability to care for myself in the future, fear of deterioration |
| <b>Anxiety</b>                      | anxiety, stress, nervousness, panic attack, stress levels, cope with stress, nervousness, rumination,                                                                                                                                                                                                                        |
| <b>Confidence</b>                   | loss of confidence, confidence, self-worth                                                                                                                                                                                                                                                                                   |
| <b>Hallucinations and Psychosis</b> | hallucinations, paranoia, delusions                                                                                                                                                                                                                                                                                          |
| <b>Side effects of medication</b>   | side effects, nausea, rash / itchiness, sleepiness as a side effect of medication (also captured in daytime sleepiness), apraxia of the eyelid opening from sinemet                                                                                                                                                          |
| <b>Dyskinesia</b>                   | dyskinesia, jerky movements, uncontrolled movements, involuntary movements, be able to sit still                                                                                                                                                                                                                             |
| <b>Impulsive and compulsive</b>     | impulsive and compulsive behaviour                                                                                                                                                                                                                                                                                           |
| <b>Medication wearing off</b>       | medication wearing off, off periods, improved 'on' time, coming down, variability, unpredictability, fluctuations                                                                                                                                                                                                            |
| <b>Eyes and Vision</b>              | blepharospasm, eye sight, vision, double vision, focussing *in relation to vision*, opening eyes,                                                                                                                                                                                                                            |
| <b>Sense of smell</b>               | smell, sense of smell                                                                                                                                                                                                                                                                                                        |

|                                 |                                                                                                |
|---------------------------------|------------------------------------------------------------------------------------------------|
| <b>Thermoregulation</b>         | Body-burning up, feeling cold, temperature control, sensitivity to cold, overheating, sweating |
| <b>Sexual</b>                   | ED (erectile dysfunction)                                                                      |
| <b>Skin</b>                     | eczema                                                                                         |
| <b>Breathing</b>                | breathing, improving my breath control                                                         |
| <b>Nose</b>                     | runny-nose                                                                                     |
| <b>Heart and blood pressure</b> | Blood pressure, heart-rate, dizziness, lightheadedness                                         |

#### **Other, out-of-scope, responses**

|                                 |                                                                                                                          |
|---------------------------------|--------------------------------------------------------------------------------------------------------------------------|
| <b>Uncategorised</b>            | Unclear/vague responses                                                                                                  |
| <b>Cure</b>                     | Cure, stop/halt/reverse progression, not have Parkinson's anymore                                                        |
| <b>Better treatments</b>        | Better, longer lasting treatments, fewer side effects, more effective                                                    |
| <b>Better care</b>              | Improved diagnosis / management, access to nurses/therapists, dietary advice/management                                  |
| <b>Maintaining independence</b> | Independence, ability to work, ability to drive, ability to take care of myself, reliant on others, loss of independence |
